# Supplementary material for: Investigating the longitudinal association between diabetes and anxiety: a systematic review and meta‐analysis
Source: PubMed Central journal article supplement — Diabet Med. 2018 Mar 25;35(6):677–93. doi: 10.1111/dme.13606 (PMC5969311; doi:10.1111/dme.13606), 2018-03-25

## Appendix VI: Forest plots for more adjusted analyses

### Forest plot for most adjusted analysis: Hazards Ratio

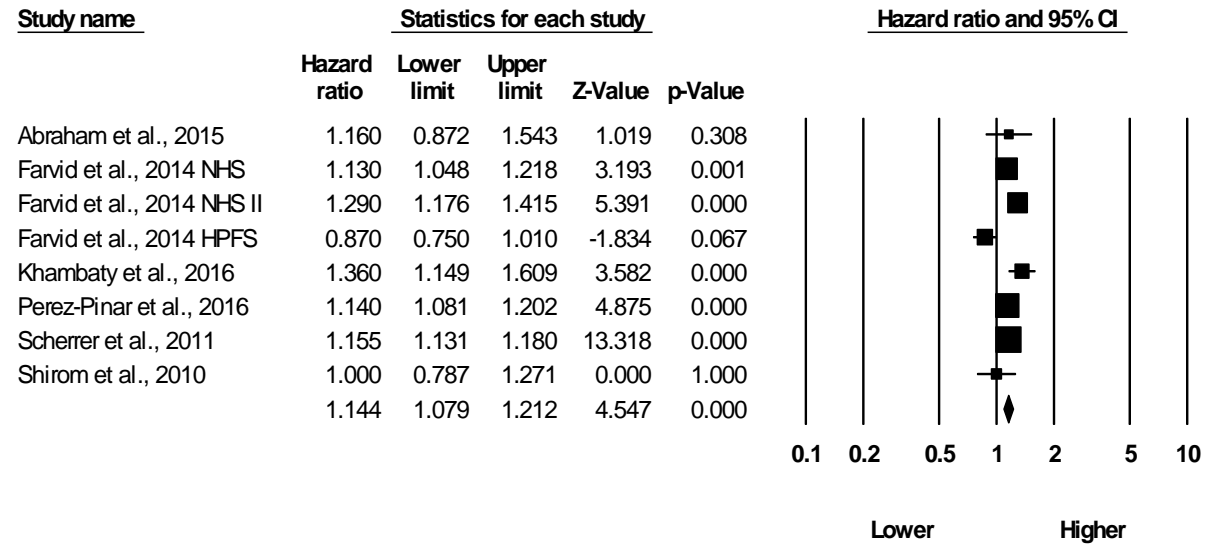

## Forest plot for most adjusted analysis: Odds Ratio

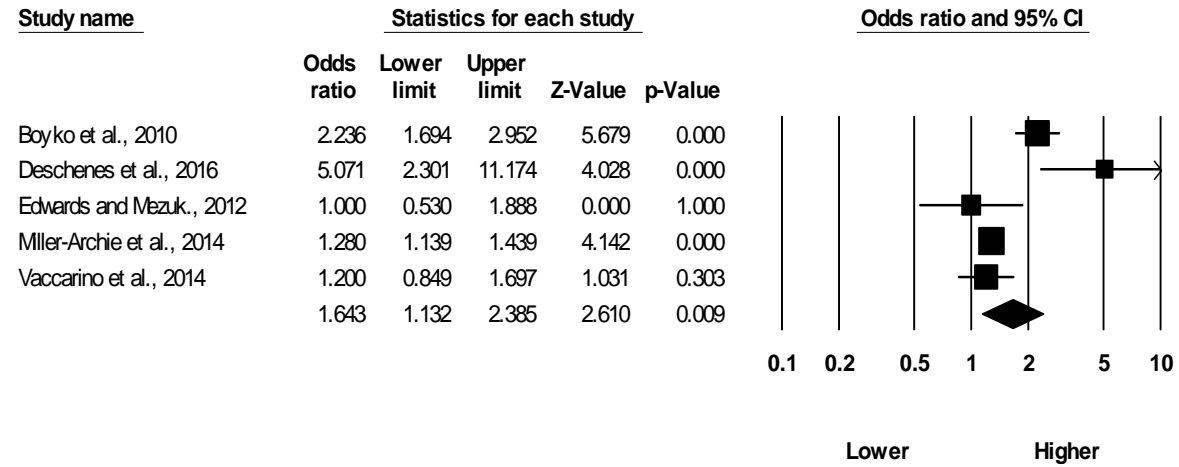

## Forest plot for most adjusted analysis: Risk Ratio

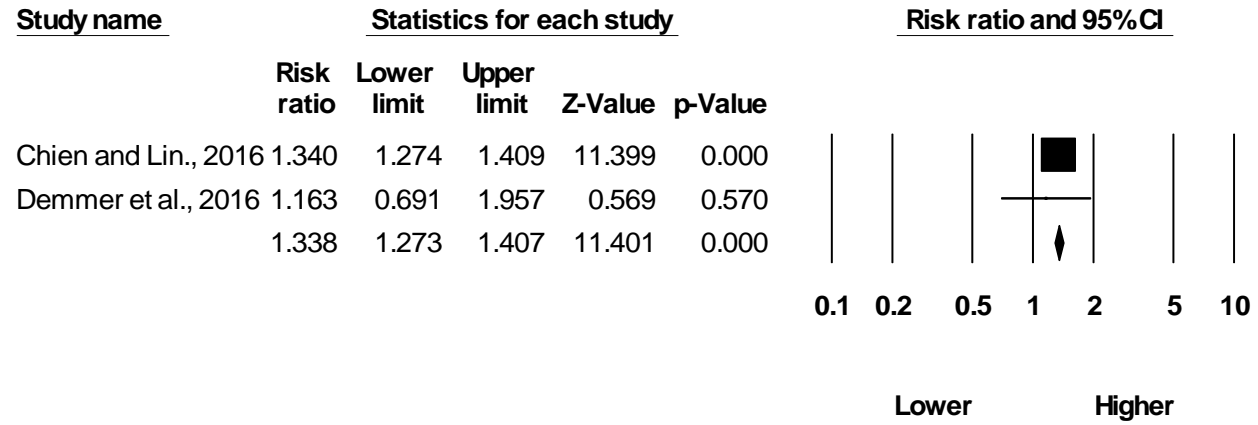

Supplement: DME-35-677-s002.pdf [file DME-35-677-s002.pdf]
